# Supplementary material for: Prognostic significance of ZEB1 and ZEB2 in digestive cancers: a cohort-based analysis and secondary analysis
Source: PubMed Central journal article supplement (PMC5458220; doi:10.18632/oncotarget.15634), 2017-02-23
Supplement: oncotarget-08-31435-s001.pdf [file oncotarget-08-31435-s001.pdf]

## **Prognostic significance of ZEB1 and ZEB2 in digestive cancers: a cohort-based analysis and secondary analysis**

### **SUPPLEMENTARY TABLE**

#### **Supplementary Table 1: PRISMA 2009 checklist**

See Supplementary File 1
